# Supplementary material
Source: PubMed Central journal article supplement (PMC3894107)
Supplement: NIHMS506871-supplement.pdf [file NIHMS506871-supplement.pdf]

Supplementary material

**Spatial and temporal mapping of de novo mutations in schizophrenia to a fetal prefrontal cortical network**

Suleyman Gulsuner\*, Tom Walsh\*, Amanda C. Watts\*, Ming K. Lee, Anne M.

Thornton, Silvia Casadei, Caitlin Rippey, Hashem Shahin, Consortium on the Genetics of Schizophrenia (COGS), PAARTNERS Study Group, Vishwajit L. Nimgaonkar, Rodney C. P. Go, Robert M. Savage, Neal R. Swerdlow, Raquel E. Gur, David L. Braff, Mary-Claire King<sup>+</sup>, Jon M. McClellan

\*These authors contributed equally to this work

+Correspondence to Mary-Claire King: [mcking@uw.edu](mailto:mcking@uw.edu)

## CONTENTS

Figure S1. Individual and joint coverage of trios

Figure S2. Networks of genes harboring de novo benign mutations

Table S1. Participants

Table S2. Proportions of non-synonymous de novo mutations in six studies

Table S3. *De novo* mutations in schizophrenia probands and unaffected siblings

Table S4. *De novo* mutations in unaffected siblings from published studies

Table S5. Number of tissues by brain region and developmental stage

Table S6. Network analyses of four brain regions at three developmental stages

Table S7. Network of analyses of subregions of prefrontal cortex

Table S8. Probands harboring two or more damaging de novo mutations

Procedures: Participants, genomics, network analyses, author notes

References for supplementary materials

**Figure S1. Individual coverage and joint coverage of trios.** On average across all samples, 93% of targeted regions were covered at  $\geq 10X$  (dots with connecting lines). Joint coverage of each parent-parent-child trio was defined as fold-coverage for the least well covered individual in the trio (Iossifov et al., 2012). Proportions of trios with  $>10X$  joint coverage are shown as black dots and with  $>20X$  joint coverage are shown as open circles.

**Figure S2. Interconnectedness of transcriptional co-expression networks, at various developmental stages and in different brain regions, based on genes harboring *de novo* benign mutations.** Co-expression of genes harboring *de novo* benign mutations in cases and in controls was evaluated using RNASeq data from the BrainSpan Atlas. Gene pairs were defined as co-expressed if  $|R| \geq 0.8$  for their RNASeq expression levels across all tissues from a given brain region and a given developmental stage. Networks were created for co-expressed gene pairs as described for Figure 2B. Dotted lines indicate numbers of connections (edges) in networks created using genes with *de novo* benign mutations in cases. Histograms represent distributions of the numbers of edges in 10,000 simulated networks using 247 genes with *de novo* benign mutations in controls.

Table S1: Participants.

Insert Excel file Table S1

**Notes.** For COGS participants, premorbid IQ was estimated using the Wide Range Achievement Test, Third edition (WRAT-3), reading subtest (Jastak and Wilkinson, 1993). For UW participants, IQ was assessed using the Wechsler Abbreviated Scales of Intelligence (WASI) (Stano, 1999)

**Table S2. Proportions of non-synonymous *de novo* mutations in six exome studies**

| Type             | Present study | O'Roak et al. 2012 | Neale et al. 2012 | Iossifov et al. 2012 | Sanders et al. 2012 | Xu et al. 2012 |
|------------------|---------------|--------------------|-------------------|----------------------|---------------------|----------------|
| Silent           | 50            | 84                 | 50                | 148                  | 67                  | 30             |
| Missense         | 92            | 186                | 101               | 414                  | 207                 | 126            |
| Nonsense         | 13            | 18                 | 10                | 28                   | 15                  | 6              |
| Total coding     | 155           | 288                | 161               | 590                  | 289                 | 162            |
| % non-synonymous | 67.7          | 70.8               | 68.9              | 74.9                 | 76.8                | 81.5           |

**Notes:** For each study, information is drawn from reported analyses, including data provided in supplemental information.

**Table S3: De novo mutations in schizophrenia probands and unaffected siblings.**

Insert excel file Table S3

**Table S4. De novo mutations in unaffected siblings from other exome studies of autism and schizophrenia**

Insert excel file Table S4



**Table S5. Number of tissues by brain region and developmental stage used in network analyses (BrainSpan, 2013)**

| Brain region | Tissue                                                      | Number of specimens |                   |             |
|--------------|-------------------------------------------------------------|---------------------|-------------------|-------------|
|              |                                                             | 13-26 pcw           | 4 months-11 years | 13-23 years |
| SC           | STR Striatum                                                | 11                  | 8                 | 5           |
|              | MD Mediodorsal nucleus of thalamus                          | 9                   | 9                 | 5           |
|              | AMY Amygdaloid complex                                      | 10                  | 11                | 5           |
|              | HIP Hippocampus                                             | 11                  | 11                | 5           |
| SM           | A1C Primary auditory cortex (core)                          | 11                  | 11                | 6           |
|              | M1C Primary motor cortex (area M1, area 4)                  | 7                   | 10                | 6           |
|              | S1C Primary somatosensory cortex (areas S1,3,1,2)           | 7                   | 11                | 6           |
|              | V1C Primary visual cortex (striate cortex, area V1/17)      | 12                  | 12                | 6           |
| FC           | DFC Dorsolateral prefrontal cortex                          | 12                  | 11                | 6           |
|              | MFC Anterior (rostral) cingulate (medial prefrontal) cortex | 11                  | 11                | 6           |
|              | OFC Orbital frontal cortex                                  | 8                   | 11                | 6           |
|              | VFC Ventrolateral prefrontal cortex                         | 11                  | 12                | 6           |
| TP           | ITC Inferolateral temporal cortex (area TEv, area 20)       | 8                   | 12                | 6           |
|              | STC Posterior (caudal) superior temporal cortex (area TAc)  | 12                  | 11                | 6           |
|              | IPC Posteroinferior (ventral) parietal cortex               | 11                  | 11                | 6           |

SC: sub-cortical regions, SM: sensory-motor regions, FC: frontal cortex, TP: temporal-parietal cortex. 13-16 pcw (post conception weeks): fetal, 4 months – 11 years: infancy to late childhood, 13 - 23 years: adolescence to adulthood

**Table S6. Network analyses of four brain regions at three developmental periods**

Abbreviations: pcw: post conception week, SC: sub-cortical regions, SM: sensory-motor regions, FC: frontal cortex, TP: temporal-parietal cortex

| <b>Stages</b>                                            | <b>Tissues</b> | <b>Nodes</b> | <b>P</b> | <b>Corrected P</b> | <b>Edges</b> | <b>P</b> | <b>Corrected P</b> |
|----------------------------------------------------------|----------------|--------------|----------|--------------------|--------------|----------|--------------------|
| All periods<br>(13pcw-23yrs)                             | All tissues    | 24           | 0.21     | 0.21               | 42           | 0.95     | 0.95               |
| Fetal<br>(13-26 pcw)                                     | SC             | 23           | 0.009    | 0.10               | 25           | 0.06     | 0.50               |
|                                                          | SM             | 19           | 0.28     | 0.98               | 21           | 0.17     | 0.89               |
|                                                          | FC             | 25           | 0.03     | 0.33               | 50           | 0.00006  | 0.0007             |
|                                                          | TP             | 30           | 0.0009   | 0.01               | 44           | 0.01     | 0.16               |
| Infancy to late<br>childhood<br>(4 months –<br>11 years) | SC             | 39           | 0.10     | 0.70               | 180          | 0.19     | 0.92               |
|                                                          | SM             | 38           | 0.36     | 0.99               | 261          | 0.03     | 0.30               |
|                                                          | FC             | 36           | 0.67     | 1.00               | 244          | 0.05     | 0.47               |
|                                                          | TP             | 36           | 0.69     | 1.00               | 249          | 0.04     | 0.41               |
| Adolescence to<br>adulthood<br>(13 – 23 years)           | SC             | 34           | 0.27     | 0.98               | 54           | 0.91     | 1.00               |
|                                                          | SM             | 35           | 0.79     | 1.00               | 201          | 0.12     | 0.78               |
|                                                          | FC             | 37           | 0.26     | 0.97               | 149          | 0.33     | 0.99               |
|                                                          | TP             | 36           | 0.69     | 1.00               | 191          | 0.16     | 0.88               |

**Table S7. Network analyses of subregions of prefrontal cortex**

| <b>Tissue group</b> | <b>Nodes</b> | <b>P</b> | <b>Corrected P</b> | <b>Edges</b> | <b>P</b> | <b>Corrected P</b> |
|---------------------|--------------|----------|--------------------|--------------|----------|--------------------|
| DFC                 | 36           | 0.03     | 0.11               | 67           | 0.0001   | 0.0005             |
| VFC                 | 41           | 0.06     | 0.23               | 74           | 0.0004   | 0.002              |
| MFC                 | 30           | 0.38     | 0.85               | 64           | 0.03     | 0.12               |
| OFC                 | 44           | 0.79     | 1.00               | 115          | 0.15     | 0.49               |

DFC; Dorsolateral prefrontal cortex, MFC; Anterior (rostral) cingulate (medial prefrontal) cortex, OFC; Orbital frontal cortex, VFC; Ventrolateral prefrontal cortex.

**Table S8: Probands harboring two or more damaging *de novo* mutations**

| Family     | Gene     | Effect        | Comments                                                                                                                   |
|------------|----------|---------------|----------------------------------------------------------------------------------------------------------------------------|
| NIMH000007 | multiple | del 2 MB      | Genomic hotspot associated with schizophrenia and autism (Moreno-De-Luca et al., 2010)                                     |
| NIMH000007 | SERPINI1 | R393stop      | Neuronal differentiation; postmortem expression differences in schizophrenia (Vawter et al., 2004)                         |
| NIMH000009 | BLNK     | R49stop       | Signaling and immune function (Imamura et al., 2009)                                                                       |
| NIMH000009 | FILIP1   | R1119W        | Neuronal migration (Sato and Nagano, 2005)                                                                                 |
| NIMH000009 | MKI67    | K857stop      | Cellular proliferation (OMIM 176741)                                                                                       |
| NIMH000026 | FRY      | T1538A        | Neuronal dendritic patterning (Emoto et al., 2004)                                                                         |
| NIMH000026 | HIF1A    | L386V         | Neuroprotective factor (Umschweif et al., 2013)                                                                            |
| NIMH000079 | KIAA1109 | Q2439stop     | Cell growth and differentiation; neuronal synaptic transmission (Verstreken et al., 2009).                                 |
| NIMH000079 | NCAN     | P1219L        | Neuronal adhesion and migration, SNPs associated with schizophrenia and mania (Muhleisen et al., 2012; Miro et al., 2012). |
| NIMH000255 | DTX1     | L69V          | Notch1 signaling, gliogenesis (Patten et al., 2006)                                                                        |
| NIMH000255 | INTS1    | S295N         | Integrator complex, snRNA transcription (OMIM 611345)                                                                      |
| NIMH019055 | RUNX3    | R211H         | Transcription factor, cell growth and differentiation in brain (Horsfield et al., 2007)                                    |
| NIMH019055 | SLIT2    | N521T         | SLIT-ROBO signaling pathway (Zhang et al., 2012)                                                                           |
| NIMH063154 | ITGA3    | P680A         | Neuronal migration (Kähler et al., 2008)                                                                                   |
| NIMH063154 | MYH9     | c.2838(+1)G>T | Cytokinesis, cell motility (Li et al., 2008)                                                                               |
| NIMH070188 | DCDC5    | P27R          | Doublecortin superfamily, neuronal migration (Liu, 2011)                                                                   |
| NIMH070188 | SLIT3    | C1011Y        | SLIT-ROBO signaling pathway (Zhang et al., 2012)                                                                           |
| SZ502      | LDLRAD4  | G22S          | SNPs associated with schizophrenia (Kikuchi et al., 2003)                                                                  |
| SZ502      | CRYBG3   | del TACTA     | $\beta\gamma$ -crystallin (Rajanikanth et al., 2012)                                                                       |

## PROCEDURES

### PARTICIPANTS

Participants were 399 persons: 105 probands, 84 of their unaffected siblings, and their 210 unaffected parents (Table S1). Families were drawn from the Consortium on the Genetics of Schizophrenia (COGS) (Calkins et al., 2007) and Project Among African-Americans to Explore Risks of Schizophrenia (PAARTNERS) (Aliyu et al. 2006), with DNA samples provided by the Center for Collaborative Genomic Studies on Mental Disorders at Rutgers University ([www.nimhgenetics.org](http://www.nimhgenetics.org)); and from families from the University of Washington, who previously had been evaluated for *de novo* CNVs with no such events found (Walsh et al., 2008). All probands met DSM-IV criteria for schizophrenia. All parents and siblings were free of major psychiatric illness; including psychotic illness, bipolar disorder and major depressive disorder.

Participants recruited through COGS and PAARTNERS received a comprehensive evaluation including the Diagnostic Interview for Genetic Studies (DIGS) (Nurnberger et al., 1994) and the Family Interview for Genetic Studies (FIGS) (Maxwell, 1996). Participants recruited at the University of Washington received a comprehensive evaluation by the Structured Clinical Interview for DSM-IV (SCID) (First et al., 1996) and the FIGS, in addition to clinical diagnoses. For all cases, diagnostic assignment incorporated information from medical records, health professionals, and available school records. Subject recruitment, sampling, and genomic analyses were conducted with approvals of local institutional review boards.

## GENOMICS

From genomic DNA of the 399 participants, library construction, exome capture, and sequencing were carried out as previously described (Walsh et al., 2010), with some modifications. Library construction and exome capture were performed on a Bravo liquid handling robot (Agilent) in 96-well format. Samples were prepared by subjecting 1  $\mu$ g of genomic DNA to acoustic fragmentation (Covaris), end-polishing, A-tailing, ligation of sequencing barcoded adaptors, and PCR amplification (Illumina). Sample libraries were captured by solution-based exome enrichment using SeqCap EZ Exome v2.0 (Nimblegen), then 1  $\mu$ g of library was hybridized to biotinylated capture probes for 72 hours at 47C and recovered via binding to streptavidin beads. Unbound DNA was washed away, and the captured DNA PCR amplified for 17 cycles. DNA samples of related subjects were prepared in the same 96-well plate to avoid potential batch effects. Library concentration and flow-cell loading cluster densities were determined using concentration values from the high sensitivity assay on a TapeStation (Agilent). Equimolar concentrations of four barcoded exome libraries were cluster-amplified per flow-cell lane. Sequencing was performed on an Illumina HiSeq2000 using paired-end 101bp runs with a 7bp index read with v3 Sequence-by-Synthesis chemistry. All samples were sequenced to median depth of at least 100X and considered complete when exome targeted read coverage was >10x over >90% of the exome target.

Samples were processed from real-time base-calls (RTA1.8 software [Bustard]), converted to qseq.txt files, and aligned to a human reference (hg19) using BWA v0.6.1-r104 (Li and Durbin, 2009). Sites with at least 10x coverage were retained. SAM alignment files were converted into BAM format and PCR duplicates were removed from read pairs with identical coordinates using SAMtools v0.1.18 (Li et al., 2009). Quality score recalibration and indel realignments were done

with GATK v1.5-21 prior using recommended parameters ([www.broadinstitute.org/gatk/](http://www.broadinstitute.org/gatk/)) prior to variant calling on each family. Genotypes were called using MAQ0.7.1, SAMtools v0.1.18, and GATK v1.5-21 independently with default parameters. Exome-based calls of copy number variants were made by CoNIFER (Krumm et al., 2012).

In order to exclude artifacts and common SNPs, variants were compared to dbSNP v135, to publicly available variants from 6,500 exomes sequenced by the NHLBI exome sequencing project ([evs.gs.washington.edu/EVS/](http://evs.gs.washington.edu/EVS/)), and to 800 exomes previously sequenced in our lab. Insertions and deletions of 1 to 23 bp in length were identified using the pipeline developed by Ming Lee. Candidate *de novo* variants were retained if at least 30% of total reads represented the variant, after adjusting by individual inspection for genomic complexities (e.g. multiple pseudogenes of *CHEK2*).

For each candidate *de novo* variant, primers were designed using Primer3 software (Rozen and Skaletsky, 2000), genomic DNA samples of the proband or sib and both parents were amplified, then PCR products were purified and Sanger sequenced in both directions. For some variants, sequence could be read in only one direction due to nearby repeats or indels. Candidate *de novo* CNVs were validated by custom TaqMan copy number assays. For candidate *de novo* CNVs not flanked by segmental duplications, exact genomic breakpoints were determined with diagnostic PCR primers and Sanger sequencing. *De novo* variants were defined as variants present in a proband or a sib and absent from both parents.

## NETWORK ANALYSIS

Network analysis was in two parts: (1) assessment of protein-protein interactions based on the GeneMANIA PPI dataset (Mostafavi et al., 2008) and (2) assessment of co-expression of genes evaluated by RNASeq in the BrainSpan Atlas of Developing Human Brain (2013). For the co-expression analyses, tissues were included from four anatomic regions of the brain: frontal cortex (FC), temporal and parietal regions (TP), sensory-motor regions (SM), and sub-cortical regions (SC); and from three developmental stages: fetal (13 – 26 post-conception weeks, corresponding to the second trimester of pregnancy), early infancy to late childhood (4 months – 11 years), and adolescence to adulthood (13 – 23 years) (Supplementary Table 6). Co-expression networks were constructed using absolute values of Pearson correlation coefficients of genes evaluated pair-wise. Gene pairs with  $|R| \geq 0.8$  were defined as “connected” in the network constructions for each brain region and each developmental stage.

In order to build an appropriate comparison group of networks from control genes, we pooled genes with damaging *de novo* mutations in unaffected siblings from our cohort with genes harboring damaging *de novo* mutations in unaffected siblings of autism and schizophrenia probands from recently published studies (Xu et al., 2012; Iossifov et al., 2012; O’Roak et al., 2012; Sanders et al., 2012).

We applied the same criteria to define damaging versus benign mutations that we used for the variants in our schizophrenia probands. In the published healthy sibling cohorts, after exclusion of variants observed in both proband and unaffected sibling (n=9), variants without a precise nucleotide change definition (n=2) and variants that failed validation (n=2); 547 *de novo* events were pooled and 276 events in 267 different genes were predicted as damaging. Of these 267



genes, 264 were represented in the GeneMania and Developing Human Brain datasets, and were used as the control gene pool (Table S4). Using this pool, 10,000 random control gene sets were created each containing 54 different genes; corresponding to the number of genes harboring predicted damaging events in our probands (excluding genes potentially impacted by the two large *de novo* CNVs on chromosomes 2q21 and 17q12, each detected in one patient). PPI and co-expression networks were constructed for each gene set.

By counting the numbers of nodes and edges of each network, we estimated the statistical significance of differences in interconnectedness of case gene networks versus control gene networks. The means and standard deviations of numbers of nodes and edges in the simulated networks were fit to normal distributions. The significance of networks for genes harboring damaging mutations in probands was estimated using Z-scores. For graphical representation in Figure 5, the protein-protein physical interaction network and the most significant co-expression network (DFC) were merged using Cytoscape 2.8.394.

## **Complete Author List**

### **Investigators of the Consortium on the Genetics of Schizophrenia (COGS):**

Supported by NIH grants R01MH065562, R01MH43518, R01MH065554, R01MH65707, R01MH065571, R01MH65588, R01MH65578, R01MH65558

#### **University of California San Diego**

David Braff, MD, Principal Investigator, National Director of COGS  
Neal Swerdlow, MD, PhD, Investigator, Deputy Director of COGS  
Kristin S. Cadenhead MD, Investigator  
Tiffany Greenwood, PhD, Investigator  
Gregory Light, PhD, Investigator  
Ming Tsuang, MD, PhD, DSc, Investigator

#### **Mount Sinai School of Medicine**

Larry Siever, PhD, Principal Investigator  
Jeremy Silverman, PhD, Investigator

#### **University of California Los Angeles**

Michael Green, PhD, Principal Investigator  
Keith Nuechterlein, PhD, Investigator  
Catherine Sugar, PhD, Principal Investigator of Data Group

#### **University of Colorado**

Robert Freedman MD, Principal Investigator  
Ann Olincy, MD, Investigator

#### **University of Pennsylvania**

Raquel Gur, MD, PhD, Principal Investigator  
Monica Calkins, PhD, Investigator  
Ruben Gur, PhD, Investigator  
Bruce Turetsky, MD, Investigator

#### **University of Washington**

Debby Tsuang, MD, Principal Investigator  
Al Radant, MD, Investigator  
Dorcas J. Dobie, MD, Investigator

#### **Harvard University**

Larry J. Seidman, PhD, Principal Investigator  
William S. Stone, PhD, Investigator

**Stanford University**

Laura Lazzeroni, PhD, Principal Investigator  
Amrita Ray, PhD, Investigator

**Scripps Translational Science Institute**

Nik Schork, PhD, Consultant

**Investigators of the Project among African-Americans to Explore Risks of Schizophrenia (PAARTNERS):**

Supported by NIH grants R01MH66006, R01MH66278, R01MH066049, R01MH66181, R01MH66121, R01MH066005, R01MH66050, R01MH66263, R01MH66004

**University of Alabama at Birmingham**

Tolulope Aduroja, MD, PhD, Investigator  
Laura Montgomery-Barefield, MD, Investigator  
Rodney C.P. Go, PhD, Principal Investigator  
Adrienne C. Lahti, MD, Investigator  
Paul Lyons, MD, PhD, Co-Principal Investigator  
Roberta May, MA, CCRC Investigator  
Robert M. Savage, PhD, Co-Principal Investigator  
Charles L. Swanson, Jr., MD, Investigator

**Duke University**

Trina Allen, MD, Investigator  
Joseph P. McEvoy, MD, Principal Investigator  
William Wilson, PhD, Investigator

**University of Mississippi**

Joseph Kwentus, MD, Principal Investigator  
Judith O’Jile, PhD, Investigator

**Morehouse School of Medicine**

L. Diane Bradford, PhD, Principal Investigator

**University of Pennsylvania**

Raquel Gur, MD, PhD, Principal Investigator  
Ruben Gur, PhD, Co-Investigator  
Monica Calkins, PhD, Investigator

**University of Pittsburgh Site I**

Bernie Devlin, PhD, Principal Investigator

**University of Pittsburgh Site II**

Vishwajit L. Nimgaonkar, MD, PhD, Principal Investigator  
Rohan Ganguli, MD, Co-Principal Investigator  
Kim Mathos, DO, MPH, Co-Principal Investigator

**Medical University of South Carolina**

Al Santos, MD, Principal Investigator  
Steve McLeod-Bryant, Co-Investigator

**University of Tennessee-Memphis**

Neil B. Edwards, MD, Principal Investigator

## References

Aliyu, M.H., Calkins, M.E., Swanson, C.L. Jr., Lyons, P.D., Savage, R.M., May, R., Wiener, H., McLeod-Bryant, S., Nimgaonkar, V.L., Ragland, J.D., et al., (2006). Project among African-Americans to explore risks for schizophrenia (PAARTNERS): Recruitment and assessment methods. *Schizophr. Res.* 87, 32-44.

BrainSpan: Atlas of the Developing Human Brain. (2013). [www.brainspan.org](http://www.brainspan.org)

Calkins, M.E., Dobie, D.J., Cadenhead, K.S., Olincy, A., Freedman, R., Green, M.F., Greenwood, T.A., Gur, R.E., Gur, R.C., Light, G.A., et al. (2007). The consortium on the genetics of endophenotypes in schizophrenia (COGS): Model recruitment, assessment, and endophenotyping methods for a multi-site collaboration. *Schizophr. Bull.* 33, 33-48.

Cooper, G.M., Goode, D.L., Ng, S.B., Sidow, A., Bamshad, M.J., Shendure, J., Nickerson, D.A. (2010). Single-nucleotide evolutionary constraint scores highlight disease-causing mutations. *Nat. Methods* 7, 250-251

Emoto, K., He, Y., Ye, B., Grueber, W.B., Adler, P.N., Jan, L.Y., and Jan, Y.N. (2004). Control of dendritic branching and tiling by the Tricornered-kinase/Furry signaling pathway in *Drosophila* sensory neurons. *Cell* 119, 245-56.

First, M.B., Gibbon, M., Spitzer, R.L., and Williams, J. (1996). User's guide for the structured clinical interview for DSM-IV axis I disorders, research version. American Psychiatric Press, Inc. Washington, DC.

Grantham, R. (1974) Amino acid difference formula to help explain protein evolution. *Science* 185, 862-864

Horsfield, J.A., Anagnostou, S.H., Hu, J.K., Cho, K.H., Geisler, R., Lieschke, G., Crosier, K.E., and Crosier, P.S. (2007). Cohesin-dependent regulation of Runx genes. *Development* 134, 2639-2649,.

Imamura, Y., Oda, A., Katahira, T., Bundo, K., Pike, K.A., Ratcliffe, M.J., and Kitamura, D. (2009). BLNK binds active H-Ras to promote B cell receptor-mediated capping and ERK activation. *J Biol Chem.* 284, 9804-13.

Iossifov, I., Ronemus M, Levy D, Wang Z, Hakker I, Rosenbaum J, Yamrom B, Lee YH, Narzisi G, Leotta A, et al. (2012). *De novo* gene disruptions in children on the autistic spectrum. *Neuron* 74, 285-299.

Jastak, S., and Wilkinson, G. (1993). Wide Range Achievement Test, revision 3. Jastak Assoc, Wilmington, Delaware.

Kähler, A.K., Djurovic, S., Kulle, B., Jönsson, E.G., Agartz, I., Hall, H., Opjordsmoen, S., Jakobsen, K.D., Hansen, T., Melle, I., et al. (2008). Association analysis of schizophrenia on 18 genes involved in neuronal migration: MDGA1 as a new susceptibility gene. *Am. J. Med. Genet. B Neuropsychiatr. Genet.* 147B, 1089-1100

- Kikuchi, M., Yamada, K., Toyota, T., and Yoshikawa, T. (2003). C18orf1 located on chromosome 18p11.2 may confer susceptibility to schizophrenia. *J. Med. Dent. Sci.* 50, 225-9.
- Krumm, N., Sudmant, P.H., Ko, A., O'Roak, B.J., Malig, M., Coe, B.P., NHLBI Exome Sequencing Project, Quinlan, A.R., Nickerson, D.A., and Eichler, E.E. (2012). Copy number variation detection and genotyping from exome sequence data. *Genome Res.* 22, 1525-1532.
- Li, H., and Durbin, R. (2009). Fast and accurate short read alignment with Burrows-Wheeler transform. *Bioinformatics* 25, 1754-60.
- Li, H., Handsaker, B., Wysoker, A., Fennell, T., Ruan, J., Homer, N., Marth, G., Abecasis, G., and Durbin, R. (2009). The Sequence Alignment Map format and SAMtools. *Bioinformatics* 25, 2078-2079.
- Li, Y., Lalwani, A.K., and Mhatre, A.N. (2008). Alternative splice variants of MYH9. *DNA Cell Biol.* 27, 117-25.
- Liu, J.S. (2011). Molecular genetics of neuronal migration disorders. *Curr. Neurol. Neurosci. Rep.* 11, 171-178.
- Maxwell, M.E. (1996). The Family Interview for Genetics Studies (FIGS). NIMH, Bethesda, Maryland.
- McClellan, J., and King, M.C. (2010). Genetic heterogeneity in human disease. *Cell* 141, 210-217.
- Miró, X., Meier, S., Dreisow M.L., Frank J., Strohmaier J., Breuer R., Schmal C., Albayram O., Pardo-Olmedilla M.T., Mühleisen T.W., et al. (2012). Studies in humans and mice implicate neurocan in the etiology of mania. *Am. J. Psychiatry* 169, 982-990.
- Moreno-De-Luca D., SGENE Consortium, Mull, J.G., Simons Simplex Collection Genetics Consortium, Kaminsky, E.B., Sanders, S.J., GeneSTAR, Myers, S.M., Adam, M.P., Pakula, A.T., Eisenhauer, N.J., Uhas, K., Weik, L., et al. (2010). Deletion 17q12 is a recurrent copy number variant that confers high risk of autism and schizophrenia. *Am. J. Hum. Genet.* 87, 618-630.
- Mostafavi, S., Ray, D., Warde-Farley, D., Grouios, C., and Morris, Q. (2008). GeneMANIA: a real-time multiple association network integration algorithm for predicting gene function. *Genome Biol.* 9, S4.
- Mühleisen, T.W., Mattheisen, M., Strohmaier, J., Degenhardt, F., Priebe, L., Schultz, C.C., Breuer, R., Meier, S., Hoffmann, P., GROUP Investigators, Rivandeneira, F., et al. (2012). Association between schizophrenia and common variation in neurocan (NCAN), a genetic risk factor for bipolar disorder. *Schizophr. Res.* 138, 69-73.
- Neale, B.M., Kou, Y., Liu, L., Ma'ayan, A., Samocha, K.E., Sabo, A., Lin, C.F., Stevens, C., Wang, L.S., Makarov, V., et al. (2012). Patterns and rates of exonic de novo mutations in autism spectrum disorders. *Nature* 485, 242-245.
- Nurnberger, J.I. Jr., Blehar, M.C., Kaufmann, C.A., York-Cooler, C., Simpson, S.G., Harkavy-Friedman, J., Severe, J.B., Malaspina, D., and Reich, T. (1994). Diagnostic interview for genetic

studies: Rationale, unique features, and training. NIMH Genetics Initiative. *Arch. Gen. Psychiatry* 51, 849–859.

O’Roak, B.J., Vives, L., Girirajan, S., Karakoc, E., Krumm, N., Coe, B.P., Levy, R., Ko, A., Lee, C., Smith, J.D., et al. (2012). Sporadic autism exomes reveal a highly interconnected protein network of de novo mutations. *Nature* 485, 246-250.

Patten, B.A., Sardi, S.P., Koirala, S., Nakafuku, M., and Corfas, G. (2006). Notch1 signaling regulates radial glia differentiation through multiple transcriptional mechanisms. *J. Neurosci.* 26, 3102-8.

Rajanikanth, V., Srivastava, S.S., Singh, A.K., Rajyalakshmi, M., Chandra, K., Aravind, P., Sankaranarayanan, R., and Sharma, Y. (2012). Aggregation-prone near-native intermediate formation during unfolding of a structurally similar nonlenticular  $\beta\gamma$ -crystallin domain. *Biochemistry* 51, 8502-13.

Rozen S, and Skaletsky HJ. (2000). Primer3 on the WWW for general users and for biologist programmers. In: Krawetz S, Misener S (eds) *Bioinformatics Methods and Protocols: Methods in Molecular Biology*. Humana Press, Totowa, NJ, pp 365-386.

Sanders, S.J, Murtha, M.T., Gupta, A.R., Murdoch, J.D., Raubeson, M.J., Willsey, A.J., Ercan-Sencicek, A.G., DiLullo, N.M., Parikshak, N.N., Stein, J.L., et al. (2012). *De novo* mutations revealed by whole-exome sequencing are strongly associated with autism. *Nature* 485, 237-241.

Sato, M., and Nagano, T. (2005). Involvement of filamin A and filamin A-interacting protein (FILIP) in controlling the start and cell shape of radially migrating cortical neurons. *Anat Sci Int.* 80, 19-29.

Stano, JF. (1999). Wechsler Abbreviated Scale of Intelligence. Psychological Corporation, San Antonio, Texas.

Umschweif, G., Alexandrovich, A.G., Trembovler, V., Horowitz, M., and Shohami, E. (2013). Hypoxia-inducible factor 1 is essential for spontaneous recovery from traumatic brain injury and is a key mediator of heat acclimation induced neuroprotection. *J. Cereb. Blood Flow Metab.* 33, 524-31

Vawter, M.P., Shannon Weickert, C., Ferran, E., Matsumoto, M., Overman, K., Hyde, T.M., Weinberger, D.R., Bunney, W.E., and Kleinman, J.E. (2004). Gene expression of metabolic enzymes and a protease inhibitor in the prefrontal cortex are decreased in schizophrenia. *Neurochem Res.* 29, 1245-1255.

Verstreken, P., Ohyama, T., Haueter, C., Habets, R.L., Lin Y.Q., Swan L.E., Ly C.V., Venken K.J., De Camilli P., and Bellen H.J. (2009). Tweek, an evolutionarily conserved protein, is required for synaptic vesicle recycling. *Neuron* 63, 203-215.

Walsh, T., Shahin, H., Elkan-Miller, T., Lee, M.K., Thornton, A.M., Roeb, W., Abu Rayyan, A., Loulus, S., Avraham, K.B., King, M.C., and Kanaan, M. (2010). Whole exome sequencing and homozygosity mapping identify mutation in the cell polarity protein GPM2 as the cause of nonsyndromic hearing loss DFNB82. *Amer. J. Hum. Genet.* 87, 90-94



Walsh, T., McClellan, J.M., McCarthy, S.E., Addington, A.M., Pierce, S.B., Cooper, G.M., Nord, A.S., Kusenda, M., Malhotra, D., Bhandari, A., et al. (2008). Rare structural variants disrupt multiple genes in neurodevelopmental pathways in schizophrenia. *Science* 320, 539-543.

Xu, B., Ionita-Laza, I., Roos, J.L., Boone, B., Woodrick, S., Sun, Y., Levy, S., Gogos, J.A., and Karayiorgou, M. (2012). De novo gene mutations highlight patterns of genetic and neural complexity in schizophrenia. *Nat Genet.* 44, 1365-1369.

Zhang, C., Gao, J., Zhang, H., Sun, L., and Peng, G. (2012). Robo2-Slit and Dcc-Netrin1 coordinate neuron axonal pathfinding within the embryonic axon tracts. *J. Neurosci.* 32, 12589-12602.
